# Supplementary material
Source: Springer Nature journal article supplement (https://www.springermedizin.de/resource/supplementary/12958_2013_1151_MOESM5_ESM.pdf/9566920)

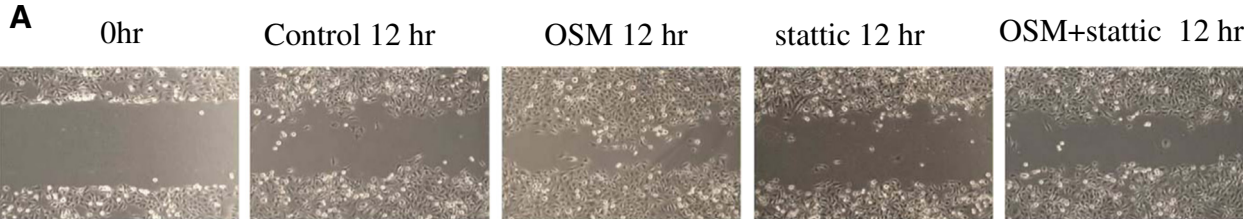

**B**

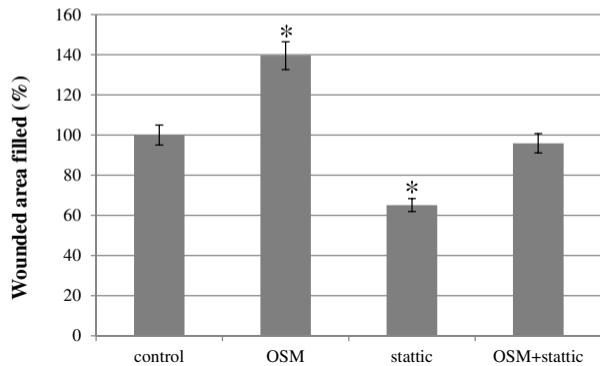

Supplement: MOESM5 [file 9566920]
